# Supplementary material for: Intranasal HD-Ad-FS vaccine induces systemic and airway mucosal immunities against SARS-CoV-2 and systemic immunity against SARS-CoV-2 variants in mice and hamsters
Source: Front Immunol. 2024 Aug 30;15:1430928. doi: 10.3389/fimmu.2024.1430928 (PMC11392758; doi:10.3389/fimmu.2024.1430928)
Supplement: Supplementary file 2 [file Table1.xlsx]

## Sheet: S62 (Reads) trimmed r...
Chromosome	Region	Type	Reference	Allele	Reference allele	Length	Linkage	Zygosity	Count	Coverage	Frequency	Probability	Forward read count	Reverse read count	Forward read coverage	Reverse read coverage	Forward/reverse balance	Average quality	Read count	Read coverage	# unique start positions	# unique end positions	Read position test probability	Read direction test probability	Hyper-allelic	Homopolymer	Homopolymer length	QUAL	Coding region change	Amino acid change	Amino acid change in longest transcript	Coding region change in longest transcript	Other variants within codon	Non-synonymous	Start by 3' rule	Symbols by 3' rule
NC_045512	241	SNV	C	T	No	1		Homozygous	233969	236903	98.7615	1	214413	220568	216927	221781	0.492925	30.6434	434981	438708	88	93	2.73226e-13	1	no	No	1	200	YP_009724389.1:c.-25C>T; YP_009725295.1:c.-25C>T				No	-
NC_045512	2832	SNV	A	G	No	1		Homozygous	1046	1251	83.6131	1	954	453	955	657	0.321962	32.7772	1407	1612	7	15	0	0.0638173	no	No	1	200	YP_009724389.1:c.2567A>G; YP_009725295.1:c.2567A>G	YP_009725295.1:p.Lys856Arg; YP_009724389.1:p.Lys856Arg	YP_009724389.1:p.Lys856Arg	YP_009724389.1:c.2567A>G	No	Yes
NC_045512	3037	SNV	C	T	No	1		Homozygous	13715	13769	99.6078	1	8991	13431	9006	13484	0.40099	31.6416	22422	22490	34	41	0.996698	1	no	No	1	200	YP_009724389.1:c.2772C>T; YP_009725295.1:c.2772C>T			YP_009724389.1:c.2772C>T	No	No
NC_045512	5386	SNV	T	G	No	1		Homozygous	1930	1948	99.076	1	955	1876	969	1882	0.337337	32.5404	2831	2851	13	20	0.0494715	1	no	No	1	200	YP_009724389.1:c.5121T>G; YP_009725295.1:c.5121T>G			YP_009724389.1:c.5121T>G	No	No
NC_045512	5730	SNV	C	T	No	1		Homozygous	943	943	100	1	879	849	879	849	0.491319	33.4422	1728	1728	7	10	1	1	no	No	1	200	YP_009724389.1:c.5465C>T; YP_009725295.1:c.5465C>T	YP_009725295.1:p.Thr1822Ile; YP_009724389.1:p.Thr1822Ile	YP_009724389.1:p.Thr1822Ile	YP_009724389.1:c.5465C>T	No	Yes
NC_045512	6513..6515	Deletion	GTT	-	No	3		Homozygous	434	436	99.5413	1	210	429	210	431	0.328638	30.9885	639	641	5	8	1	1	no	No	1	200	YP_009724389.1:c.6248_6250delGTT; YP_009725295.1:c.6248_6250delGTT	YP_009725295.1:p.Ser2083_Leu2084delinsIle; YP_009724389.1:p.Ser2083_Leu2084delinsIle	YP_009724389.1:p.Ser2083_Leu2084delinsIle	YP_009724389.1:c.6248_6250delGTT	No	Yes	6512
NC_045512	8393	SNV	G	A	No	1		Homozygous	13124	13133	99.9315	1	13033	12609	13041	12617	0.491732	34.3401	25642	25658	36	38	1	1	no	No	1	200	YP_009724389.1:c.8128G>A; YP_009725295.1:c.8128G>A	YP_009725295.1:p.Ala2710Thr; YP_009724389.1:p.Ala2710Thr	YP_009724389.1:p.Ala2710Thr	YP_009724389.1:c.8128G>A	No	Yes
NC_045512	10029	SNV	C	T	No	1		Homozygous	32828	32944	99.6479	1	23043	32234	23144	32257	0.416864	33.268	55277	55401	33	42	1.88112e-11	1	no	No	1	200	YP_009724389.1:c.9764C>T; YP_009725295.1:c.9764C>T	YP_009725295.1:p.Thr3255Ile; YP_009724389.1:p.Thr3255Ile	YP_009724389.1:p.Thr3255Ile	YP_009724389.1:c.9764C>T	No	Yes
NC_045512	10449	SNV	C	A	No	1		Homozygous	3101	3108	99.7748	1	2989	2586	2996	2588	0.463857	30.6875	5575	5584	18	33	1	1	no	No	1	200	YP_009724389.1:c.10184C>A; YP_009725295.1:c.10184C>A	YP_009725295.1:p.Pro3395His; YP_009724389.1:p.Pro3395His	YP_009724389.1:p.Pro3395His	YP_009724389.1:c.10184C>A	No	Yes
NC_045512	11283..11291	Deletion	GTTTGTCTG	-	No	9		Homozygous	4130	4183	98.733	1	1881	3297	1901	3336	0.363268	30.7654	5178	5237	28	44	0.950462	1	no	No	1	200	YP_009724389.1:c.11022_11030delGTCTGGTTT; YP_009725295.1:c.11022_11030delGTCTGGTTT	YP_009725295.1:p.Leu3674_Gly3676del; YP_009724389.1:p.Leu3674_Gly3676del	YP_009724389.1:p.Leu3674_Gly3676del	YP_009724389.1:c.11022_11030delGTCTGGTTT	No	Yes	11286	11286: GTCTGGTTT
NC_045512	11537	SNV	A	G	No	1		Homozygous	9413	9428	99.8409	1	7855	9143	7867	9154	0.462113	34.0403	16998	17021	23	38	1	1	no	No	1	200	YP_009724389.1:c.11272A>G; YP_009725295.1:c.11272A>G	YP_009725295.1:p.Ile3758Val; YP_009724389.1:p.Ile3758Val	YP_009724389.1:p.Ile3758Val	YP_009724389.1:c.11272A>G	No	Yes
NC_045512	13195	SNV	T	C	No	1		Homozygous	67753	67932	99.7365	1	40074	62966	40106	63136	0.388917	33.4472	103040	103242	82	103	4.8548e-08	1	no	No	1	200	YP_009724389.1:c.12930T>C; YP_009725295.1:c.12930T>C			YP_009724389.1:c.12930T>C	No	No
NC_045512	14408	SNV	C	T	No	1		Homozygous	1320	1676	78.7589	1	1189	1304	1538	1320	0.476935	33.9053	2493	2858	10	16	0	0.691384	no	No	1	200	YP_009724389.1:c.14144C>T; YP_009725295.1:c.*925C>T	YP_009724389.1:p.Pro4715Leu	YP_009724389.1:p.Pro4715Leu	YP_009724389.1:c.14144C>T	No	Yes
NC_045512	15240	SNV	C	T	No	1		Homozygous	20096	20251	99.2346	1	20057	11072	20109	11186	0.355681	33.8469	31129	31295	32	41	0	1	no	No	1	200	YP_009724389.1:c.14976C>T; YP_009725295.1:c.*1757C>T			YP_009724389.1:c.14976C>T	No	No
NC_045512	21762	Deletion	C	-	No	1		Homozygous	22010	22038	99.8729	1	21858	19298	21886	19300	0.468899	30.7853	41156	41186	19	27	1	1	no	No	1	200	YP_009724389.1:c.*207delC; YP_009724390.1:c.200delC; YP_009724391.1:c.-3631delC; YP_009724392.1:c.-4483delC; YP_009724393.1:c.-4761delC	YP_009724390.1:p.Ala67fs	YP_009724390.1:p.Ala67fs	YP_009724390.1:c.200delC	Yes	Yes	21761
NC_045512	21764	Deletion	A	-	No	1		Homozygous	21929	21976	99.7861	1	21778	19219	21824	19238	0.46879	31.7396	40997	41062	19	27	0.999995	1	no	No	1	200	YP_009724389.1:c.*209delA; YP_009724390.1:c.202delA; YP_009724391.1:c.-3629delA; YP_009724392.1:c.-4481delA; YP_009724393.1:c.-4759delA	YP_009724390.1:p.Ile68fs	YP_009724390.1:p.Ile68fs	YP_009724390.1:c.202delA	Yes	Yes	21763
NC_045512	21767..21770	Deletion	CATG	-	No	4		Homozygous	22132	22200	99.6937	1	21979	19427	22041	19456	0.469183	31.3721	41405	41497	31	37	0.556979	1	no	No	1	200	YP_009724389.1:c.*212_*215delCATG; YP_009724390.1:c.205_208delCATG; YP_009724391.1:c.-3626_-3623delCATG; YP_009724392.1:c.-4478_-4475delCATG; YP_009724393.1:c.-4756_-4753delCATG	YP_009724390.1:p.His69fs	YP_009724390.1:p.His69fs	YP_009724390.1:c.205_208delCATG	No	Yes	21766
NC_045512	21846	SNV	C	T	No	1		Homozygous	3081	3087	99.8056	1	336	3075	336	3081	0.0985048	33.7692	3411	3417	7	14	1	1	no	No	1	200	YP_009724389.1:c.*291C>T; YP_009724390.1:c.284C>T; YP_009724391.1:c.-3547C>T; YP_009724392.1:c.-4399C>T; YP_009724393.1:c.-4677C>T	YP_009724390.1:p.Thr95Ile	YP_009724390.1:p.Thr95Ile	YP_009724390.1:c.284C>T	No	Yes
NC_045512	21987..21995	Deletion	GTGTTTATT	-	No	9		Homozygous	1104	1107	99.729	1	1086	1080	1087	1083	0.498615	31.5715	2166	2170	10	13	1	1	no	No	1	200	YP_009724389.1:c.*432_*440delGTGTTTATT; YP_009724390.1:c.425_433delGTGTTTATT; YP_009724391.1:c.-3406_-3398delGTGTTTATT; YP_009724392.1:c.-4258_-4250delGTGTTTATT; YP_009724393.1:c.-4536_-4528delGTGTTTATT	YP_009724390.1:p.Gly142_Tyr145delinsAsp	YP_009724390.1:p.Gly142_Tyr145delinsAsp	YP_009724390.1:c.425_433delGTGTTTATT	No	Yes	21986
NC_045512	22193^22194	Insertion	-	T	No	1		Homozygous	1010	1013	99.7038	1	979	698	982	700	0.416219	34.101	1677	1682	6	7	1	1	no	No	1	200	YP_009724389.1:c.*638_*638+1insT; YP_009724390.1:c.631_632insT; YP_009724391.1:c.-3199-1_-3199insT; YP_009724392.1:c.-4051-1_-4051insT; YP_009724393.1:c.-4329-1_-4329insT	YP_009724390.1:p.Asn211fs	YP_009724390.1:p.Asn211fs	YP_009724390.1:c.631_632insT	Yes	Yes	22193
NC_045512	22195	SNV	T	G	No	1		Homozygous	1000	1003	99.7009	1	969	690	972	690	0.415913	33.914	1659	1662	6	7	1	1	no	No	1	200	YP_009724389.1:c.*640T>G; YP_009724390.1:c.633T>G; YP_009724391.1:c.-3198T>G; YP_009724392.1:c.-4050T>G; YP_009724393.1:c.-4328T>G	YP_009724390.1:p.Asn211Lys	YP_009724390.1:p.Asn211Lys	YP_009724390.1:c.633T>G	Yes	Yes
NC_045512	22197..22198	MNV	TA	GC	No	2		Homozygous	1005	1012	99.3083	1	974	698	981	699	0.417464	33.4201	1672	1680	7	8	1	1	no	No	1	200	YP_009724389.1:c.*642_*643delinsGC; YP_009724390.1:c.635_636delinsGC; YP_009724391.1:c.-3196_-3195delinsGC; YP_009724392.1:c.-4048_-4047delinsGC; YP_009724393.1:c.-4326_-4325delinsGC	YP_009724390.1:p.Leu212Cys	YP_009724390.1:p.Leu212Cys	YP_009724390.1:c.635_636delinsGC	Yes	Yes
NC_045512	22200^22201	Insertion	-	GA	No	2		Homozygous	995	1003	99.2024	1	964	687	971	690	0.416111	33.4392	1651	1661	7	8	0.99999	1	no	No	1	200	YP_009724389.1:c.*646_*646+1insAG; YP_009724390.1:c.639_640insAG; YP_009724391.1:c.-3191-1_-3191insAG; YP_009724392.1:c.-4043-1_-4043insAG; YP_009724393.1:c.-4321-1_-4321insAG	YP_009724390.1:p.Arg214fs	YP_009724390.1:p.Arg214fs	YP_009724390.1:c.639_640insAG	No	Yes	22201	22201: AG
NC_045512	22202^22203	Insertion	-	CA	No	2		Homozygous	999	1007	99.2056	1	968	690	974	694	0.416164	32.994	1658	1668	7	8	1	1	no	No	1	200	YP_009724389.1:c.*647_*647+1insCA; YP_009724390.1:c.640_641insCA; YP_009724391.1:c.-3190-1_-3190insCA; YP_009724392.1:c.-4042-1_-4042insCA; YP_009724393.1:c.-4320-1_-4320insCA; YP_009724394.1:c.-4999-1_-4999insCA	YP_009724390.1:p.Arg214fs	YP_009724390.1:p.Arg214fs	YP_009724390.1:c.640_641insCA	Yes	Yes	22202
NC_045512	22204	Replacement	T	AA	No	2		Homozygous	1012	1018	99.4106	1	982	701	985	705	0.416518	33.2918	1683	1690	8	9	0.965121	1	no	No	1	200	YP_009724389.1:c.*649delinsAA; YP_009724390.1:c.642delinsAA; YP_009724391.1:c.-3189delinsAA; YP_009724392.1:c.-4041delinsAA; YP_009724393.1:c.-4319delinsAA; YP_009724394.1:c.-4998delinsAA	YP_009724390.1:p.Asp215fs	YP_009724390.1:p.Asp215fs	YP_009724390.1:c.642delinsAA	Yes	Yes
NC_045512	22578	SNV	G	A	No	1		Homozygous	215	215	100	1	194	193	194	193	0.498708	33.8605	387	387	4	8	1	1	no	No	1	200	YP_009724389.1:c.*1023G>A; YP_009724390.1:c.1016G>A; YP_009724391.1:c.-2815G>A; YP_009724392.1:c.-3667G>A; YP_009724393.1:c.-3945G>A; YP_009724394.1:c.-4624G>A; YP_009724395.1:c.-4816G>A	YP_009724390.1:p.Gly339Asp	YP_009724390.1:p.Gly339Asp	YP_009724390.1:c.1016G>A	No	Yes
NC_045512	22673..22674	MNV	TC	CT	No	2		Homozygous	732	732	100	1	707	731	707	731	0.491655	33.0855	1438	1438	9	17	1	1	no	No	1	200	YP_009724389.1:c.*1118_*1119delinsCT; YP_009724390.1:c.1111_1112delinsCT; YP_009724391.1:c.-2720_-2719delinsCT; YP_009724392.1:c.-3572_-3571delinsCT; YP_009724393.1:c.-3850_-3849delinsCT; YP_009724394.1:c.-4529_-4528delinsCT; YP_009724395.1:c.-4721_-4720delinsCT	YP_009724390.1:p.Ser371Leu	YP_009724390.1:p.Ser371Leu	YP_009724390.1:c.1111_1112delinsCT	No	Yes
NC_045512	22679	SNV	T	C	No	1		Homozygous	730	730	100	1	705	729	705	729	0.491632	31.2616	1434	1434	6	11	1	1	no	No	1	200	YP_009724389.1:c.*1124T>C; YP_009724390.1:c.1117T>C; YP_009724391.1:c.-2714T>C; YP_009724392.1:c.-3566T>C; YP_009724393.1:c.-3844T>C; YP_009724394.1:c.-4523T>C; YP_009724395.1:c.-4715T>C	YP_009724390.1:p.Ser373Pro	YP_009724390.1:p.Ser373Pro	YP_009724390.1:c.1117T>C	No	Yes
NC_045512	22686	SNV	C	T	No	1		Homozygous	740	740	100	1	714	740	714	740	0.491059	32.2189	1454	1454	6	10	1	1	no	No	1	200	YP_009724389.1:c.*1131C>T; YP_009724390.1:c.1124C>T; YP_009724391.1:c.-2707C>T; YP_009724392.1:c.-3559C>T; YP_009724393.1:c.-3837C>T; YP_009724394.1:c.-4516C>T; YP_009724395.1:c.-4708C>T	YP_009724390.1:p.Ser375Phe	YP_009724390.1:p.Ser375Phe	YP_009724390.1:c.1124C>T	No	Yes
NC_045512	22992	SNV	G	A	No	1		Homozygous	191	191	100	1	184	146	184	146	0.442424	32.3403	330	330	5	6	1	1	no	No	1	200	YP_009724389.1:c.*1437G>A; YP_009724390.1:c.1430G>A; YP_009724391.1:c.-2401G>A; YP_009724392.1:c.-3253G>A; YP_009724393.1:c.-3531G>A; YP_009724394.1:c.-4210G>A; YP_009724395.1:c.-4402G>A; YP_009724396.1:c.-4902G>A; YP_009725318.1:c.-4764G>A	YP_009724390.1:p.Ser477Asn	YP_009724390.1:p.Ser477Asn	YP_009724390.1:c.1430G>A	No	Yes
NC_045512	22995	SNV	C	A	No	1		Homozygous	192	192	100	1	185	147	185	147	0.442771	31.5417	332	332	5	6	1	1	no	No	1	200	YP_009724389.1:c.*1440C>A; YP_009724390.1:c.1433C>A; YP_009724391.1:c.-2398C>A; YP_009724392.1:c.-3250C>A; YP_009724393.1:c.-3528C>A; YP_009724394.1:c.-4207C>A; YP_009724395.1:c.-4399C>A; YP_009724396.1:c.-4899C>A; YP_009725318.1:c.-4761C>A	YP_009724390.1:p.Thr478Lys	YP_009724390.1:p.Thr478Lys	YP_009724390.1:c.1433C>A	No	Yes
NC_045512	23013	SNV	A	C	No	1		Homozygous	187	187	100	1	103	148	103	148	0.410359	34.3155	251	251	4	5	1	1	no	No	1	200	YP_009724389.1:c.*1458A>C; YP_009724390.1:c.1451A>C; YP_009724391.1:c.-2380A>C; YP_009724392.1:c.-3232A>C; YP_009724393.1:c.-3510A>C; YP_009724394.1:c.-4189A>C; YP_009724395.1:c.-4381A>C; YP_009724396.1:c.-4881A>C; YP_009725318.1:c.-4743A>C	YP_009724390.1:p.Glu484Ala	YP_009724390.1:p.Glu484Ala	YP_009724390.1:c.1451A>C	No	Yes
NC_045512	23040	SNV	A	G	No	1		Homozygous	186	187	99.4652	1	102	148	103	148	0.408	31.8226	250	251	4	5	1	1	no	No	1	200	YP_009724389.1:c.*1485A>G; YP_009724390.1:c.1478A>G; YP_009724391.1:c.-2353A>G; YP_009724392.1:c.-3205A>G; YP_009724393.1:c.-3483A>G; YP_009724394.1:c.-4162A>G; YP_009724395.1:c.-4354A>G; YP_009724396.1:c.-4854A>G; YP_009725318.1:c.-4716A>G	YP_009724390.1:p.Gln493Arg	YP_009724390.1:p.Gln493Arg	YP_009724390.1:c.1478A>G	No	Yes
NC_045512	23048	SNV	G	A	No	1		Homozygous	187	188	99.4681	1	103	148	104	148	0.410359	32.7166	251	252	4	5	0.999827	1	no	No	1	200	YP_009724389.1:c.*1493G>A; YP_009724390.1:c.1486G>A; YP_009724391.1:c.-2345G>A; YP_009724392.1:c.-3197G>A; YP_009724393.1:c.-3475G>A; YP_009724394.1:c.-4154G>A; YP_009724395.1:c.-4346G>A; YP_009724396.1:c.-4846G>A; YP_009725318.1:c.-4708G>A	YP_009724390.1:p.Gly496Ser	YP_009724390.1:p.Gly496Ser	YP_009724390.1:c.1486G>A	No	Yes
NC_045512	23055	SNV	A	G	No	1		Homozygous	187	188	99.4681	1	102	148	103	148	0.408	32.8503	250	251	5	6	0.999939	1	no	No	1	200	YP_009724389.1:c.*1500A>G; YP_009724390.1:c.1493A>G; YP_009724391.1:c.-2338A>G; YP_009724392.1:c.-3190A>G; YP_009724393.1:c.-3468A>G; YP_009724394.1:c.-4147A>G; YP_009724395.1:c.-4339A>G; YP_009724396.1:c.-4839A>G; YP_009725318.1:c.-4701A>G	YP_009724390.1:p.Gln498Arg	YP_009724390.1:p.Gln498Arg	YP_009724390.1:c.1493A>G	No	Yes
NC_045512	23063	SNV	A	T	No	1		Homozygous	187	189	98.9418	1	102	149	104	149	0.406375	33.7647	251	253	5	6	0.984856	1	no	No	1	200	YP_009724389.1:c.*1508A>T; YP_009724390.1:c.1501A>T; YP_009724391.1:c.-2330A>T; YP_009724392.1:c.-3182A>T; YP_009724393.1:c.-3460A>T; YP_009724394.1:c.-4139A>T; YP_009724395.1:c.-4331A>T; YP_009724396.1:c.-4831A>T; YP_009725318.1:c.-4693A>T	YP_009724390.1:p.Asn501Tyr	YP_009724390.1:p.Asn501Tyr	YP_009724390.1:c.1501A>T	No	Yes
NC_045512	23075	SNV	T	C	No	1		Homozygous	197	197	100	1	106	180	106	180	0.370629	33.6853	286	286	5	7	1	1	no	No	1	200	YP_009724389.1:c.*1520T>C; YP_009724390.1:c.1513T>C; YP_009724391.1:c.-2318T>C; YP_009724392.1:c.-3170T>C; YP_009724393.1:c.-3448T>C; YP_009724394.1:c.-4127T>C; YP_009724395.1:c.-4319T>C; YP_009724396.1:c.-4819T>C; YP_009725318.1:c.-4681T>C	YP_009724390.1:p.Tyr505His	YP_009724390.1:p.Tyr505His	YP_009724390.1:c.1513T>C	No	Yes
NC_045512	23202	SNV	C	A	No	1		Homozygous	2019	2024	99.753	1	2002	1855	2006	1860	0.480944	33.6786	3857	3866	9	14	1	1	no	No	1	200	YP_009724389.1:c.*1647C>A; YP_009724390.1:c.1640C>A; YP_009724391.1:c.-2191C>A; YP_009724392.1:c.-3043C>A; YP_009724393.1:c.-3321C>A; YP_009724394.1:c.-4000C>A; YP_009724395.1:c.-4192C>A; YP_009724396.1:c.-4692C>A; YP_009725318.1:c.-4554C>A	YP_009724390.1:p.Thr547Lys	YP_009724390.1:p.Thr547Lys	YP_009724390.1:c.1640C>A	No	Yes
NC_045512	23403	SNV	A	G	No	1		Homozygous	2119	2125	99.7176	1	1762	1444	1768	1445	0.450405	33.8447	3206	3213	21	29	1	1	no	No	1	200	YP_009724389.1:c.*1848A>G; YP_009724390.1:c.1841A>G; YP_009724391.1:c.-1990A>G; YP_009724392.1:c.-2842A>G; YP_009724393.1:c.-3120A>G; YP_009724394.1:c.-3799A>G; YP_009724395.1:c.-3991A>G; YP_009724396.1:c.-4491A>G; YP_009724397.2:c.-4871A>G; YP_009725318.1:c.-4353A>G	YP_009724390.1:p.Asp614Gly	YP_009724390.1:p.Asp614Gly	YP_009724390.1:c.1841A>G	No	Yes
NC_045512	23525	SNV	C	T	No	1		Homozygous	6700	6731	99.5394	1	5599	6419	5627	6424	0.465885	29.0197	12018	12051	56	60	0.999496	1	no	No	1	200	YP_009724389.1:c.*1970C>T; YP_009724390.1:c.1963C>T; YP_009724391.1:c.-1868C>T; YP_009724392.1:c.-2720C>T; YP_009724393.1:c.-2998C>T; YP_009724394.1:c.-3677C>T; YP_009724395.1:c.-3869C>T; YP_009724396.1:c.-4369C>T; YP_009724397.2:c.-4749C>T; YP_009725318.1:c.-4231C>T	YP_009724390.1:p.His655Tyr	YP_009724390.1:p.His655Tyr	YP_009724390.1:c.1963C>T	No	Yes
NC_045512	23599	SNV	T	G	No	1		Homozygous	482	483	99.793	1	103	476	103	477	0.177893	34.2324	579	580	22	28	0.998697	1	no	No	1	200	YP_009724390.1:c.2037T>G; YP_009724391.1:c.-1794T>G; YP_009724392.1:c.-2646T>G; YP_009724393.1:c.-2924T>G; YP_009724394.1:c.-3603T>G; YP_009724395.1:c.-3795T>G; YP_009724396.1:c.-4295T>G; YP_009724397.2:c.-4675T>G; YP_009725318.1:c.-4157T>G	YP_009724390.1:p.Asn679Lys	YP_009724390.1:p.Asn679Lys	YP_009724390.1:c.2037T>G	No	Yes
NC_045512	23854	SNV	C	A	No	1		Homozygous	147	150	98	1	16	143	18	146	0.100629	33.898	159	164	9	11	0.986063	1	no	No	1	200	YP_009724390.1:c.2292C>A; YP_009724391.1:c.-1539C>A; YP_009724392.1:c.-2391C>A; YP_009724393.1:c.-2669C>A; YP_009724394.1:c.-3348C>A; YP_009724395.1:c.-3540C>A; YP_009724396.1:c.-4040C>A; YP_009724397.2:c.-4420C>A; YP_009725318.1:c.-3902C>A	YP_009724390.1:p.Asn764Lys	YP_009724390.1:p.Asn764Lys	YP_009724390.1:c.2292C>A	No	Yes
NC_045512	23948	SNV	G	T	No	1		Homozygous	112	112	100	1	105	101	105	101	0.490291	33.2143	206	206	5	4	1	1	no	No	1	200	YP_009724390.1:c.2386G>T; YP_009724391.1:c.-1445G>T; YP_009724392.1:c.-2297G>T; YP_009724393.1:c.-2575G>T; YP_009724394.1:c.-3254G>T; YP_009724395.1:c.-3446G>T; YP_009724396.1:c.-3946G>T; YP_009724397.2:c.-4326G>T; YP_009725318.1:c.-3808G>T	YP_009724390.1:p.Asp796Tyr	YP_009724390.1:p.Asp796Tyr	YP_009724390.1:c.2386G>T	No	Yes
NC_045512	24130	SNV	C	A	No	1		Homozygous	7159	7173	99.8048	1	7147	7132	7161	7144	0.499475	33.0497	14279	14305	22	29	0.997454	1	no	No	1	200	YP_009724390.1:c.2568C>A; YP_009724391.1:c.-1263C>A; YP_009724392.1:c.-2115C>A; YP_009724393.1:c.-2393C>A; YP_009724394.1:c.-3072C>A; YP_009724395.1:c.-3264C>A; YP_009724396.1:c.-3764C>A; YP_009724397.2:c.-4144C>A; YP_009725318.1:c.-3626C>A	YP_009724390.1:p.Asn856Lys	YP_009724390.1:p.Asn856Lys	YP_009724390.1:c.2568C>A	No	Yes
NC_045512	24424	SNV	A	T	No	1		Homozygous	744	775	96	1	735	529	740	557	0.418513	33.9059	1264	1297	9	11	0.000394456	1	no	No	1	200	YP_009724390.1:c.2862A>T; YP_009724391.1:c.-969A>T; YP_009724392.1:c.-1821A>T; YP_009724393.1:c.-2099A>T; YP_009724394.1:c.-2778A>T; YP_009724395.1:c.-2970A>T; YP_009724396.1:c.-3470A>T; YP_009724397.2:c.-3850A>T; YP_009725318.1:c.-3332A>T	YP_009724390.1:p.Gln954His	YP_009724390.1:p.Gln954His	YP_009724390.1:c.2862A>T	No	Yes
NC_045512	24469	SNV	T	A	No	1		Homozygous	738	738	100	1	721	524	721	524	0.420884	34.3753	1245	1245	8	9	1	1	no	No	1	200	YP_009724390.1:c.2907T>A; YP_009724391.1:c.-924T>A; YP_009724392.1:c.-1776T>A; YP_009724393.1:c.-2054T>A; YP_009724394.1:c.-2733T>A; YP_009724395.1:c.-2925T>A; YP_009724396.1:c.-3425T>A; YP_009724397.2:c.-3805T>A; YP_009725318.1:c.-3287T>A	YP_009724390.1:p.Asn969Lys	YP_009724390.1:p.Asn969Lys	YP_009724390.1:c.2907T>A	No	Yes
NC_045512	24503	SNV	C	T	No	1		Homozygous	987	989	99.7978	1	963	848	965	850	0.46825	33.9352	1811	1815	11	17	1	1	no	No	1	200	YP_009724390.1:c.2941C>T; YP_009724391.1:c.-890C>T; YP_009724392.1:c.-1742C>T; YP_009724393.1:c.-2020C>T; YP_009724394.1:c.-2699C>T; YP_009724395.1:c.-2891C>T; YP_009724396.1:c.-3391C>T; YP_009724397.2:c.-3771C>T; YP_009725318.1:c.-3253C>T	YP_009724390.1:p.Leu981Phe	YP_009724390.1:p.Leu981Phe	YP_009724390.1:c.2941C>T	No	Yes
NC_045512	25000	SNV	C	T	No	1		Homozygous	614	615	99.8374	1	435	385	435	386	0.469512	32.4039	820	821	9	12	1	1	no	No	1	200	YP_009724390.1:c.3438C>T; YP_009724391.1:c.-393C>T; YP_009724392.1:c.-1245C>T; YP_009724393.1:c.-1523C>T; YP_009724394.1:c.-2202C>T; YP_009724395.1:c.-2394C>T; YP_009724396.1:c.-2894C>T; YP_009724397.2:c.-3274C>T; YP_009725255.1:c.-4558C>T; YP_009725318.1:c.-2756C>T			YP_009724390.1:c.3438C>T	No	No
NC_045512	25584	SNV	C	T	No	1		Homozygous	18003	18011	99.9556	1	16046	17881	16053	17889	0.472957	33.5258	33927	33942	37	42	1	1	no	No	1	200	YP_009724390.1:c.*200C>T; YP_009724391.1:c.192C>T; YP_009724392.1:c.-661C>T; YP_009724393.1:c.-939C>T; YP_009724394.1:c.-1618C>T; YP_009724395.1:c.-1810C>T; YP_009724396.1:c.-2310C>T; YP_009724397.2:c.-2690C>T; YP_009725255.1:c.-3974C>T; YP_009725318.1:c.-2172C>T			YP_009724391.1:c.192C>T	No	No
NC_045512	26270	SNV	C	T	No	1		Homozygous	33541	34781	96.4348	1	32398	31097	32565	32328	0.489755	32.9356	63495	64893	36	50	0	1	no	No	1	200	YP_009724390.1:c.*886C>T; YP_009724391.1:c.*50C>T; YP_009724392.1:c.26C>T; YP_009724393.1:c.-253C>T; YP_009724394.1:c.-932C>T; YP_009724395.1:c.-1124C>T; YP_009724396.1:c.-1624C>T; YP_009724397.2:c.-2004C>T; YP_009725255.1:c.-3288C>T; YP_009725318.1:c.-1486C>T	YP_009724392.1:p.Thr9Ile	YP_009724392.1:p.Thr9Ile	YP_009724392.1:c.26C>T	No	Yes
NC_045512	26577	SNV	C	G	No	1		Homozygous	155	155	100	1	123	108	123	108	0.467532	34.6452	231	231	6	9	1	1	no	No	1	200	YP_009724390.1:c.*1193C>G; YP_009724391.1:c.*357C>G; YP_009724392.1:c.*105C>G; YP_009724393.1:c.55C>G; YP_009724394.1:c.-625C>G; YP_009724395.1:c.-817C>G; YP_009724396.1:c.-1317C>G; YP_009724397.2:c.-1697C>G; YP_009725255.1:c.-2981C>G; YP_009725318.1:c.-1179C>G	YP_009724393.1:p.Gln19Glu	YP_009724393.1:p.Gln19Glu	YP_009724393.1:c.55C>G	No	Yes
NC_045512	26709	SNV	G	A	No	1		Homozygous	494	534	92.5094	1	441	449	481	451	0.495506	32.6802	890	932	9	10	0.000212101	1	no	No	1	200	YP_009724390.1:c.*1325G>A; YP_009724391.1:c.*489G>A; YP_009724392.1:c.*237G>A; YP_009724393.1:c.187G>A; YP_009724394.1:c.-493G>A; YP_009724395.1:c.-685G>A; YP_009724396.1:c.-1185G>A; YP_009724397.2:c.-1565G>A; YP_009725255.1:c.-2849G>A; YP_009725318.1:c.-1047G>A	YP_009724393.1:p.Ala63Thr	YP_009724393.1:p.Ala63Thr	YP_009724393.1:c.187G>A	No	Yes
NC_045512	27807	SNV	C	T	No	1		Homozygous	927	929	99.7847	1	435	844	435	846	0.340109	32.8371	1279	1281	11	15	0.999671	1	no	No	1	200	YP_009724391.1:c.*1587C>T; YP_009724392.1:c.*1335C>T; YP_009724393.1:c.*616C>T; YP_009724394.1:c.*420C>T; YP_009724395.1:c.*48C>T; YP_009724396.1:c.-87C>T; YP_009724397.2:c.-467C>T; YP_009725255.1:c.-1751C>T; YP_009725318.1:c.52C>T			YP_009725318.1:c.52C>T	No	No
NC_045512	28311	SNV	C	T	No	1		Homozygous	1533	1535	99.8697	1	1492	1224	1494	1225	0.450663	31.8474	2716	2719	9	16	1	1	no	No	1	200	YP_009724392.1:c.*1839C>T; YP_009724393.1:c.*1120C>T; YP_009724394.1:c.*924C>T; YP_009724395.1:c.*552C>T; YP_009724396.1:c.*52C>T; YP_009724397.2:c.38C>T; YP_009725255.1:c.-1247C>T; YP_009725318.1:c.*424C>T	YP_009724397.2:p.Pro13Leu	YP_009724397.2:p.Pro13Leu	YP_009724397.2:c.38C>T	No	Yes
NC_045512	28362..28370	Deletion	GAGAACGCA	-	No	9		Homozygous	60287	61300	98.3475	1	59088	32079	60092	32191	0.351871	30.9477	91167	92283	52	71	0.000167443	1	no	No	1	200	YP_009724392.1:c.*1891_*1899delAGAACGCAG; YP_009724393.1:c.*1172_*1180delAGAACGCAG; YP_009724394.1:c.*976_*984delAGAACGCAG; YP_009724395.1:c.*604_*612delAGAACGCAG; YP_009724396.1:c.*104_*112delAGAACGCAG; YP_009724397.2:c.90_98delAGAACGCAG; YP_009725255.1:c.-1195_-1187delAGAACGCAG; YP_009725318.1:c.*476_*484delAGAACGCAG	YP_009724397.2:p.Glu31_Ser33del	YP_009724397.2:p.Glu31_Ser33del	YP_009724397.2:c.90_98delAGAACGCAG	No	Yes	28362	28362: AGAACGCAG
NC_045512	28881..28883	MNV	GGG	AAC	No	3		Homozygous	20427	20437	99.9511	1	18317	20247	18324	20256	0.474977	32.0075	38564	38580	59	64	0.99915	1	no	No	1	200	YP_009724393.1:c.*1690_*1692delinsAAC; YP_009724394.1:c.*1494_*1496delinsAAC; YP_009724395.1:c.*1122_*1124delinsAAC; YP_009724396.1:c.*622_*624delinsAAC; YP_009724397.2:c.608_610delinsAAC; YP_009725255.1:c.-677_-675delinsAAC; YP_009725318.1:c.*994_*996delinsAAC	YP_009724397.2:p.Arg203_Gly204delinsLysArg	YP_009724397.2:p.Arg203_Gly204delinsLysArg	YP_009724397.2:c.608_610delinsAAC	No	Yes
Sequence name	Lineage	Conflict	Ambiguity score	Scorpio call	Scorpio support	Scorpio conflict	Note	pangolin version	pangolin-data version
SARS_CoV2	BA.1.18	0		Omicron (BA.1-like)	0.86	0	Usher placements: BA.1.18(2/2)	4.1.1	v1.14
